# Supplementary material for: A highly zinc-selective ratiometric fluorescent probe based on AIE luminogen functionalized coordination polymer nanoparticles
Source: Royal Society of Chemistry journal article supplement (doi:10.1039/c6ra28551a), 2017-01-01
Supplement: c6ra28551a1.pdf [file c6ra28551a1.pdf]

## **A highly zinc-selective ratiometric fluorescent probe based on AIE luminogen functionalized coordination polymer nanoparticles**

Na Lin, Qin Zhang, Xin Xia, Mengyu Liang, Shihong Zhang, Liyan Zheng,\* Qiue Cao,\* and Zhongtao Ding

Key Laboratory of Medicinal Chemistry for Natural Resource (Yunnan University), Ministry of Education, School of Chemical Science and Technology, Yunnan University, Kunming, Yunnan 650091, P. R. China

| Substrate    | $\Phi$  | $\langle \tau \rangle$ (ns) | $k_r$ ( $10^6 \text{ s}^{-1}$ ) | $k_{nr}$ ( $10^8 \text{ s}^{-1}$ ) |
|--------------|---------|-----------------------------|---------------------------------|------------------------------------|
| HDBB         | 5.32 %  | 1.97                        | 27.0                            | 4.80                               |
| Tb-HDBB-CPNs | 14.27 % | 2.92                        | 48.86                           | 2.94                               |
| Zn-HDBB-CPNs | 17.25 % | 1.01                        | 172.5                           | 8.19                               |

Table S1. Properties of HDBB and HDBB-CPNs. Rate constants were calculated with  $\Phi$  and  $\tau$  according to the formula of  $k_r = \Phi / \tau$  and  $k_{nr} = (1 - \Phi) / \tau$

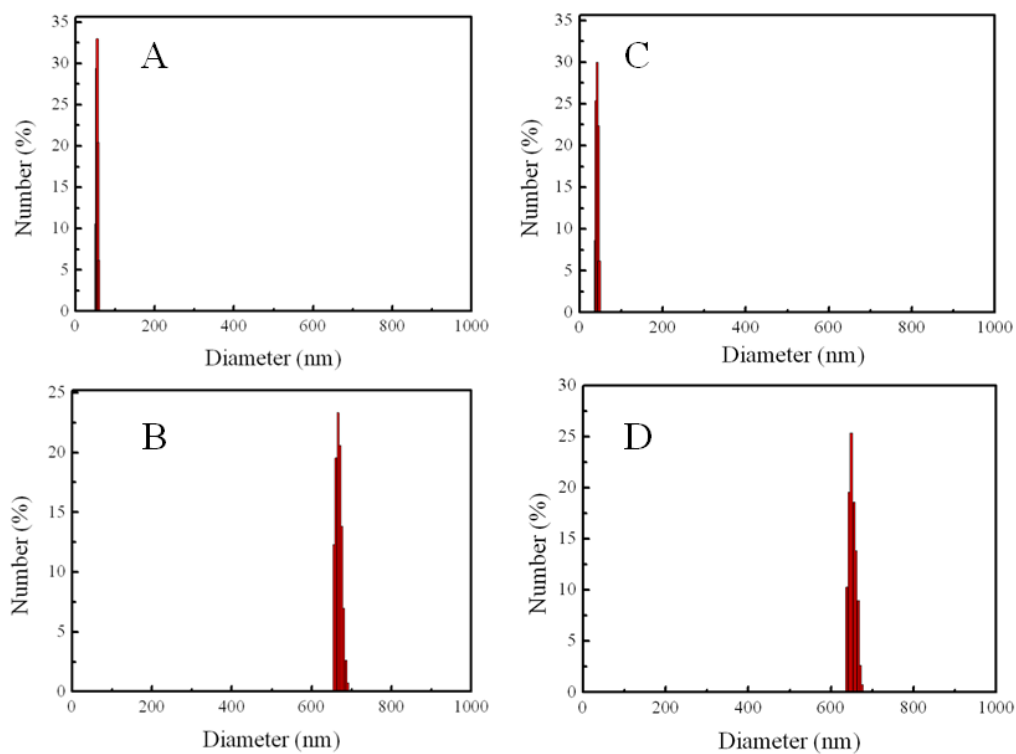

Figure S1. Particle size distribution of Tb-HDBB-CPNs (A, B) and Zn-HDBB-CPNs (C, D) stored for one month (A, C) and three months (B, D).

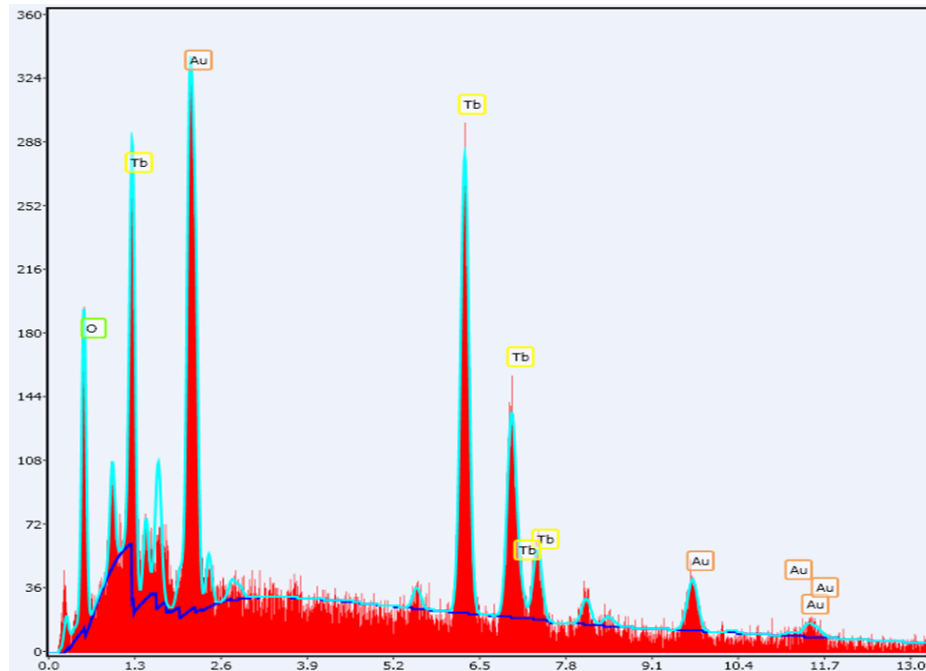

Figure S2. The EDX spectrum of Tb-HDBB-CPNs during SEM measurement.

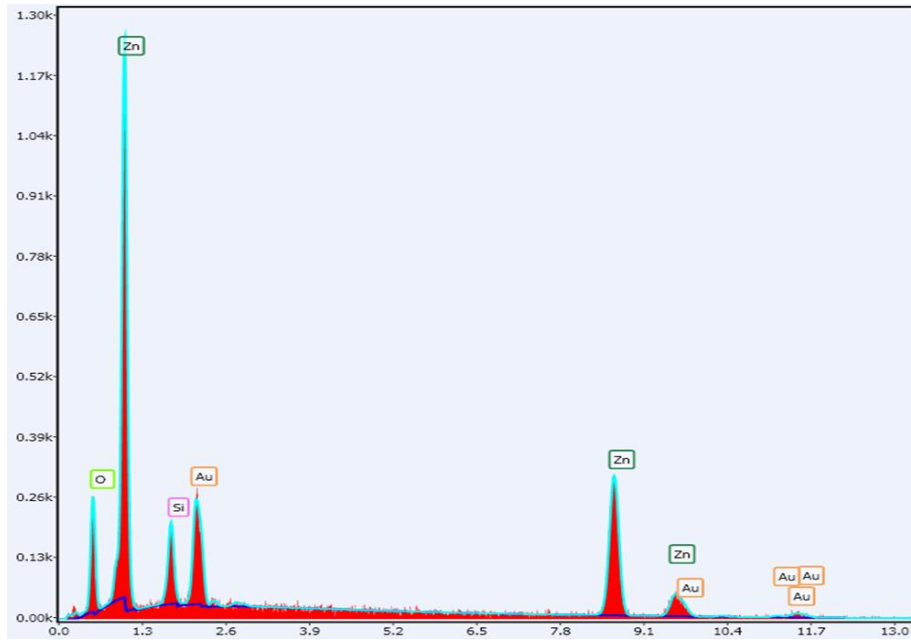

Figure S3. The EDX spectrum of Zn-HDBB-CPNs during SEM measurement.

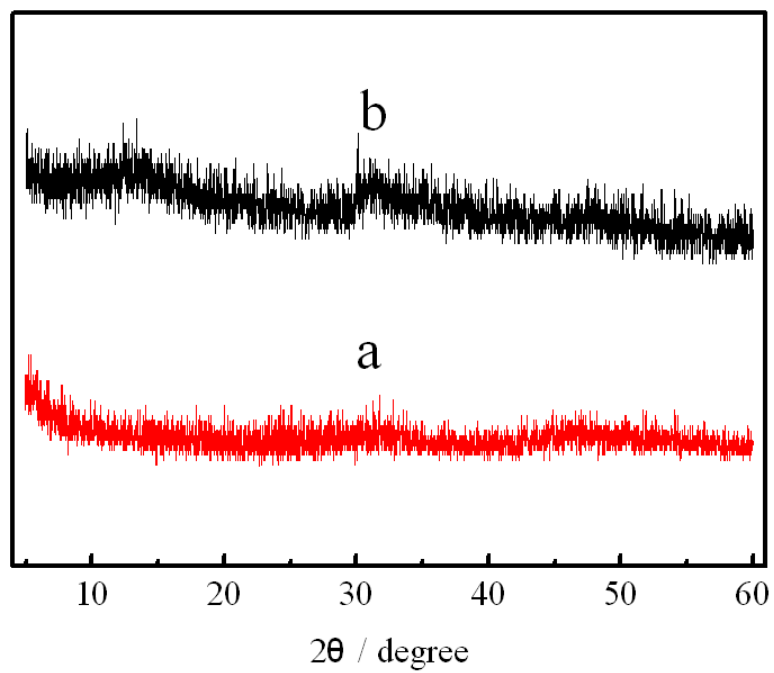

Figure S4. The XRD spectra of Tb-HDBB-CPNs (a) and Zn-HDBB-CPNs (b).

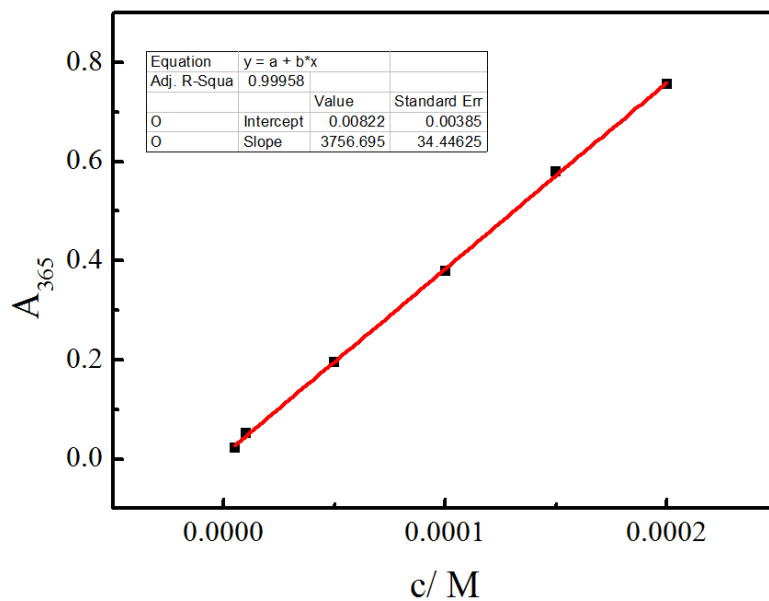

Figure S5. Standard curve of HDBB in pH 11.0 phosphate buffer solution by UV-Vis measurement.

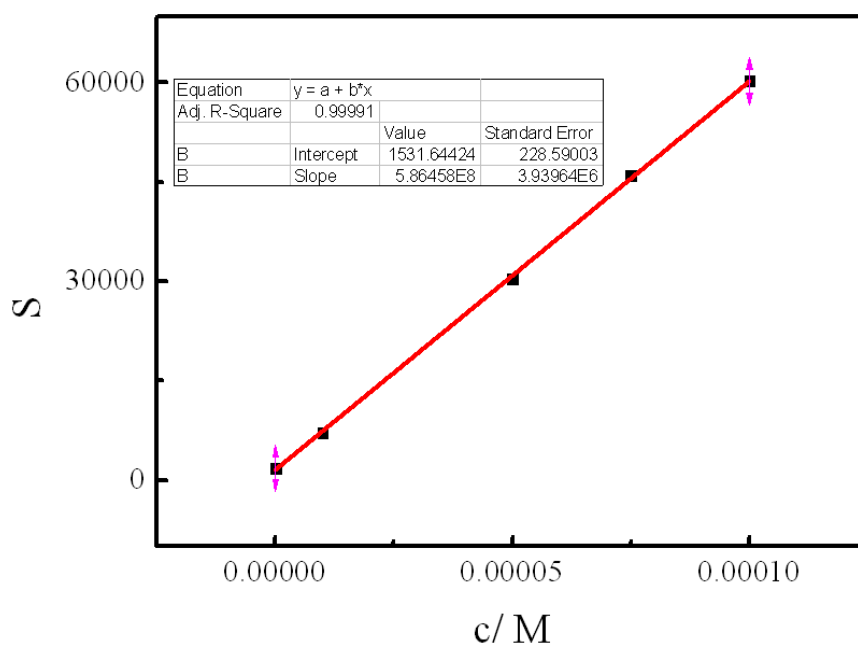

Figure S6. Standard curve of  $Tb^{3+}$  in pH 11.0 phosphate buffer solution by ICP measurement.

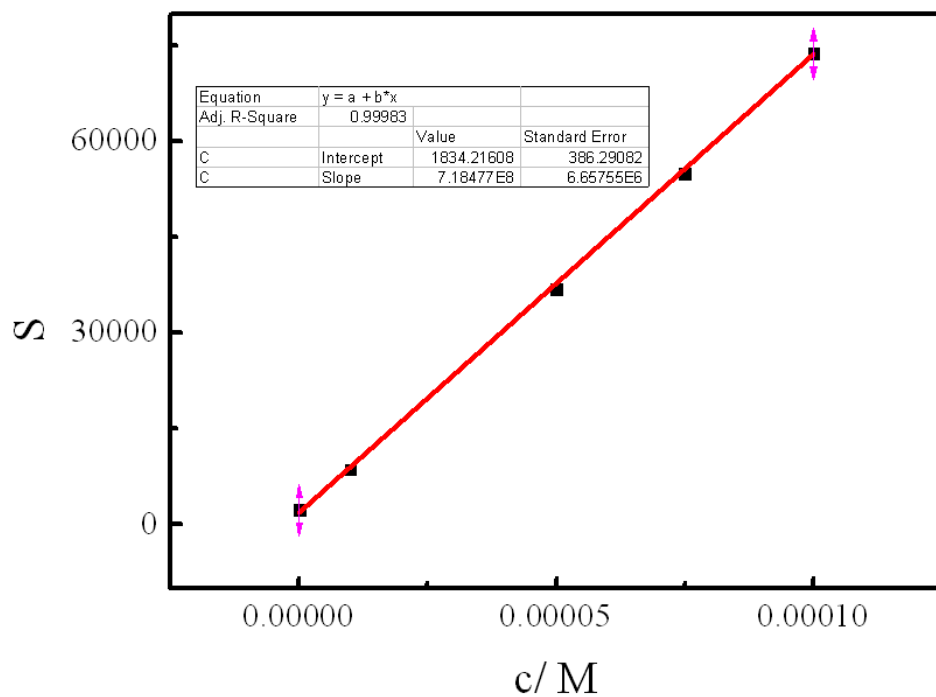

Figure S7. Standard curve of  $Zn^{2+}$  in pH 11.0 phosphate buffer solution by ICP measurement.

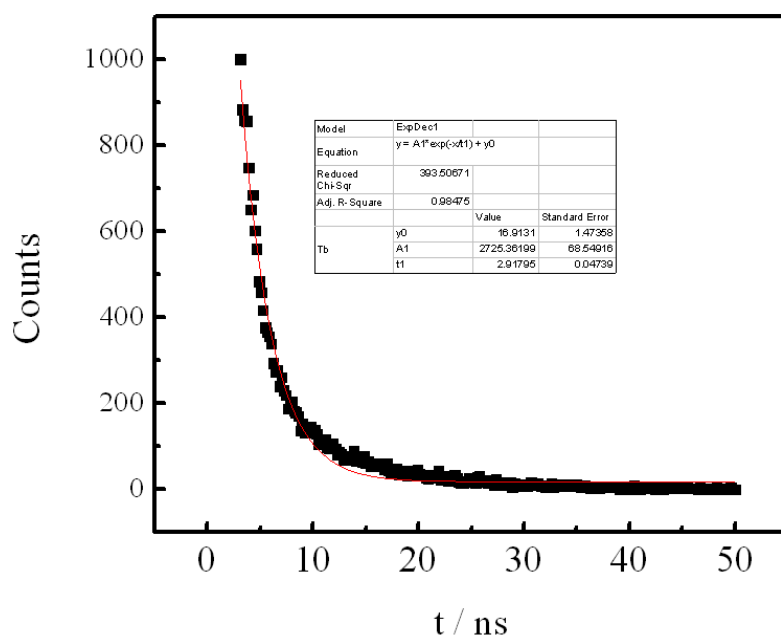

Figure S8. Emission lifetime spectrum of Tb-HDBB-CPNs in pH 7.0 Tri buffer solution.

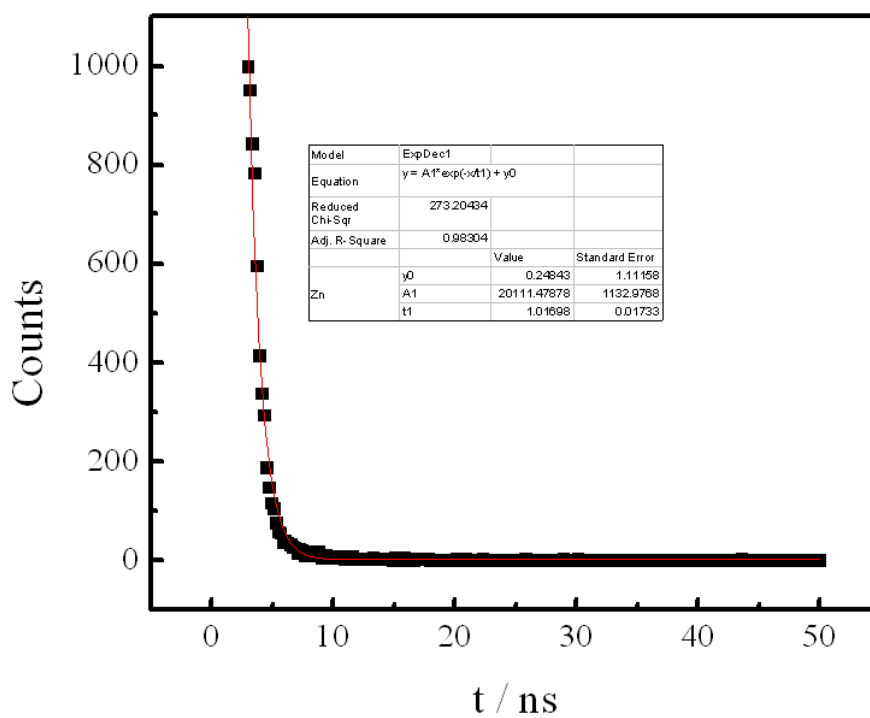

Figure S9. Emission lifetime spectrum of Zn-HDBB-CPNs in pH 7.0 Tri buffer solution.

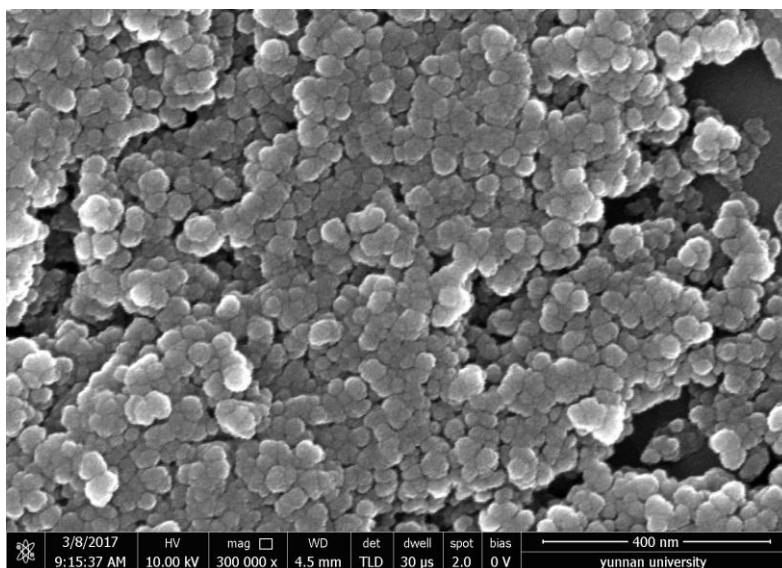

Figure S10. SEM image of Tb-HDBB-CPNs after cation exchanged by  $Zn^{2+}$ .

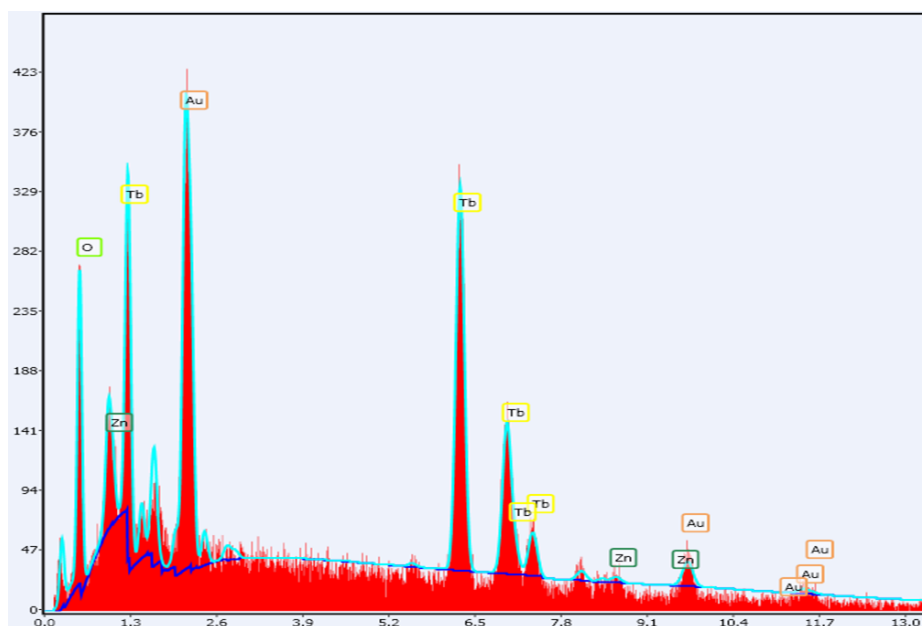

Figure S11. The EDX spectrum of Tb-HDBB-CPNs after cation exchanged by  $Zn^{2+}$  during SEM measurement.
